# Supplementary material for: Optimization of Se- and Zn-Enriched Mycelium of Lentinula edodes (Berk.) Pegler as a Dietary Supplement with Immunostimulatory Activity
Source: Preprints.org preprint supplement (doi:10.20944/preprints202309.0023.v1), 2023-09-01
Supplement: Supplementary file 2 [file supplementary]

**SUPPORTING INFORMATION**

The additional tables to which reference is made in the text are as follows:

**Table S1.** The total selenium content (µg/g) in mycelial dry mass in experiments series I-IV.

| **Series I** | | | **Series II** | | | **Series III** | | | **Series IV** | | |
| --- | --- | --- | --- | --- | --- | --- | --- | --- | --- | --- | --- |
| **Medium supplements [mM]** | | **Selenium content**  **[µg/g]**  **(S.D.)** | **Medium supplements [mM]** | | **Selenium content**  **[µg/g]**  **(S.D.)** | **Medium supplements [mM]** | | **Selenium content**  **[µg/g]**  **(S.D.)** | **Medium supplements [mM]** | | **Selenium content**  **[µg/g]**  **(S.D.)** |
| SeO32- | Zn2+ | SeO32- | Zn2+ | SeO32- | Zn2+ | SeO32- | Zn2+ |
| 0 | 0 | 2.52 a (0.17) | 0 | 0.2 | 0.75a (0.28) | 0 | 0 | 1.2a (0.78) | 0.2 | 0 | 310.84a (84.59) |
| 0.1 | 0 | 73.09 b (16.72) | 0.1 | 0.2 | 57.34b (2.23) | 0 | 0.1 | 3.43a (1.1) | 0.2 | 0.1 | 139.82b (57.40) |
| 0.2 | 0 | 380.31c (24.97) | 0.2 | 0.2 | 73.52c (10.16) | 0 | 0.2 | 1.83a (1.1) | 0.2 | 0.2 | 80.83c (4.16) |
| 0.4 | 0 | 904.31d  (70.62) | 0.4 | 0.2 | 344.10d  (48.65) | 0 | 0.4 | 1.22a (0.88) | 0.2 | 0.4 | 58.39d (12.65) |
| 0.6 | 0 | 1518.44e (96.42) | 0.6 | 0.2 | 1256.31e (120.06) | 0 | 0.6 | 1.90a (0.92) | 0.2 | 0.6 | 52.74d (4.6) |
| 0.8 | 0 | 1553.91e (102.17) | 0.8 | 0.2 | 1395.89e  (16.86) | 0 | 0.8 | 3.01a (0.65) | 0.2 | 0.8 | 44.59d (6.76) |

Standard deviations (SD) are given in brackets**,** n=5 replicates Values in the same column bearing different letters were significantly different (p< 0.05).

**Table S2.** The total zinc content (**µ**g/g) in mycelial dry mass in experiments series I-IV.

| **Series I** | | | **Series II** | | | **Series III** | | | **Series IV** | | |
| --- | --- | --- | --- | --- | --- | --- | --- | --- | --- | --- | --- |
| **Medium supplements [mM]** | | **Zinc content**  **[µg/g]**  **(S.D.)** | **Medium supplements [mM]** | | **Zinc content**  **[µg/g]**  **(S.D.)** | **Medium supplements [mM]** | | **Zinc content**  **[µg/g]**  **(S.D.)** | **Medium supplements [mM]** | | **Zinc content**  **[µg/g]**  **(S.D.)** |
| SeO32- | Zn2+ | SeO32- | Zn2+ | SeO32- | Zn2+ | SeO32- | Zn2+ |
| 0 | 0 | 298.10 a (29.02) | 0 | 0.2 | 887.82a (67.12) | 0 | 0 | 308.31a (32.89) | 0.2 | 0 | 288.96a (50.83) |
| 0.1 | 0 | 210.64 b (16.66) | 0.1 | 0.2 | 708.57b (41.68) | 0 | 0.1 | 648.89b (70.89) | 0.2 | 0.1 | 200.15a (97.07) |
| 0.2 | 0 | 288.96c (50.97) | 0.2 | 0.2 | 639.57c (45.95) | 0 | 0.2 | 920.28c (152.99) | 0.2 | 0.2 | 217.05a (55.07) |
| 0.4 | 0 | 195.71d  (7.95) | 0.4 | 0.2 | 603.41c (24.20) | 0 | 0.4 | 1372.89c (367.10) | 0.2 | 0.4 | 278.22a (33.31) |
| 0.6 | 0 | 151.87d (42.12) | 0.6 | 0.2 | 590.60c (13.17) | 0 | 0.6 | 2097.30d (290.13) | 0.2 | 0.6 | 494.77b (31.28) |
| 0.8 | 0 | 181.92d (19.46) | 0.8 | 0.2 | 591.25c (18.41) | 0 | 0.8 | 2370.32d (235.44) | 0.2 | 0.8 | 874.94c (194.16) |

Standard deviations (SD) are given in brackets**,** n=5 replicates. Values in the same column bearing different letters were significantly different (p< 0.05).
